# Supplementary material for: Mind your language: the importance of english language skills in an International Medical Programme (IMP)
Source: PubMed Central journal article supplement (PMC9134667; doi:10.1186/s12909-022-03481-w), 2022-05-26
Supplement: 12909_2022_3481_MOESM1_ESM.pdf [file 12909_2022_3481_MOESM1_ESM.pdf]

**Additional file 1: Table S1. Sample of Codes**

| THEMES  | Theme 1: English language usage in medical training and practice |                                                               |                                                                        | Theme 2: The influence of university culture and environment on EL mastery |                                                       | Theme 3: Individual EL proficiency                                |                                                                        |                                                               |
|---------|------------------------------------------------------------------|---------------------------------------------------------------|------------------------------------------------------------------------|----------------------------------------------------------------------------|-------------------------------------------------------|-------------------------------------------------------------------|------------------------------------------------------------------------|---------------------------------------------------------------|
|         | CODES                                                            | <i>Learning tool</i>                                          | <i>Professional language</i>                                           | <i>Communication tool</i>                                                  | <i>University support</i>                             | <i>Self-initiative and peer support</i>                           | <i>Academic progression</i>                                            | <i>Patient communication</i>                                  |
| PHRASES | For understanding                                                | Used in workplace setting with patients and doctors           | Communicate with foreign students                                      | Not corrected on language proficiency                                      | Peer support                                          | In describing findings                                            | Usage of simpler words in clinical setting for patients' understanding | Formal discussions                                            |
|         | Ensure understanding                                             | Communication with lecturers on emails                        | For communication with ppl out of imu, at interviews and other matters | Prefer to be corrected                                                     | Peer support                                          | Challenges learning medical terms                                 | Simplify english to ensure patients understand message conveyed        | Among health professionals to discuss medical related matters |
|         | Medium of discussion                                             | Among health professionals to discuss medical related matters | 'safe' language for discussions                                        | Punctuation corrected by lecturer in report                                | Learn vocabulary in context automatically             | More effort needed to learn because syllabus is taught in english |                                                                        | Hindrance to learning                                         |
|         | Language for discussion                                          | To converse with patients and superior                        | Reduce level of english so the other person can understand             | Encouragement from lecturer                                                | Reduce level of english to accommodate peers in class | Requires more time to learn syllabus                              |                                                                        |                                                               |
|         | Primary language                                                 |                                                               |                                                                        | Grammar errors not corrected on                                            | Online translating tools                              | Hinders presentation                                              |                                                                        |                                                               |
|         | Content over accuracy                                            |                                                               |                                                                        | Being corrected on vocabulary                                              |                                                       |                                                                   |                                                                        |                                                               |
|         | Curriculum over language                                         |                                                               |                                                                        | Unsure of university support                                               |                                                       |                                                                   |                                                                        |                                                               |
|         | Common language                                                  |                                                               |                                                                        | Not corrected on language proficiency                                      |                                                       |                                                                   |                                                                        |                                                               |
|         |                                                                  |                                                               |                                                                        | Prefer to be corrected                                                     |                                                       |                                                                   |                                                                        |                                                               |
|         |                                                                  |                                                               |                                                                        | Through participation in university activities                             |                                                       |                                                                   |                                                                        |                                                               |
